# Supplementary material for: Obesity results in adipose tissue T cell exhaustion
Source: PubMed Central journal article supplement (PMC8119198; doi:10.1172/jci.insight.139793), 2021-04-22
Supplement: jciinsight-6-139793-s011.pdf [file jciinsight-6-139793-s011.pdf]

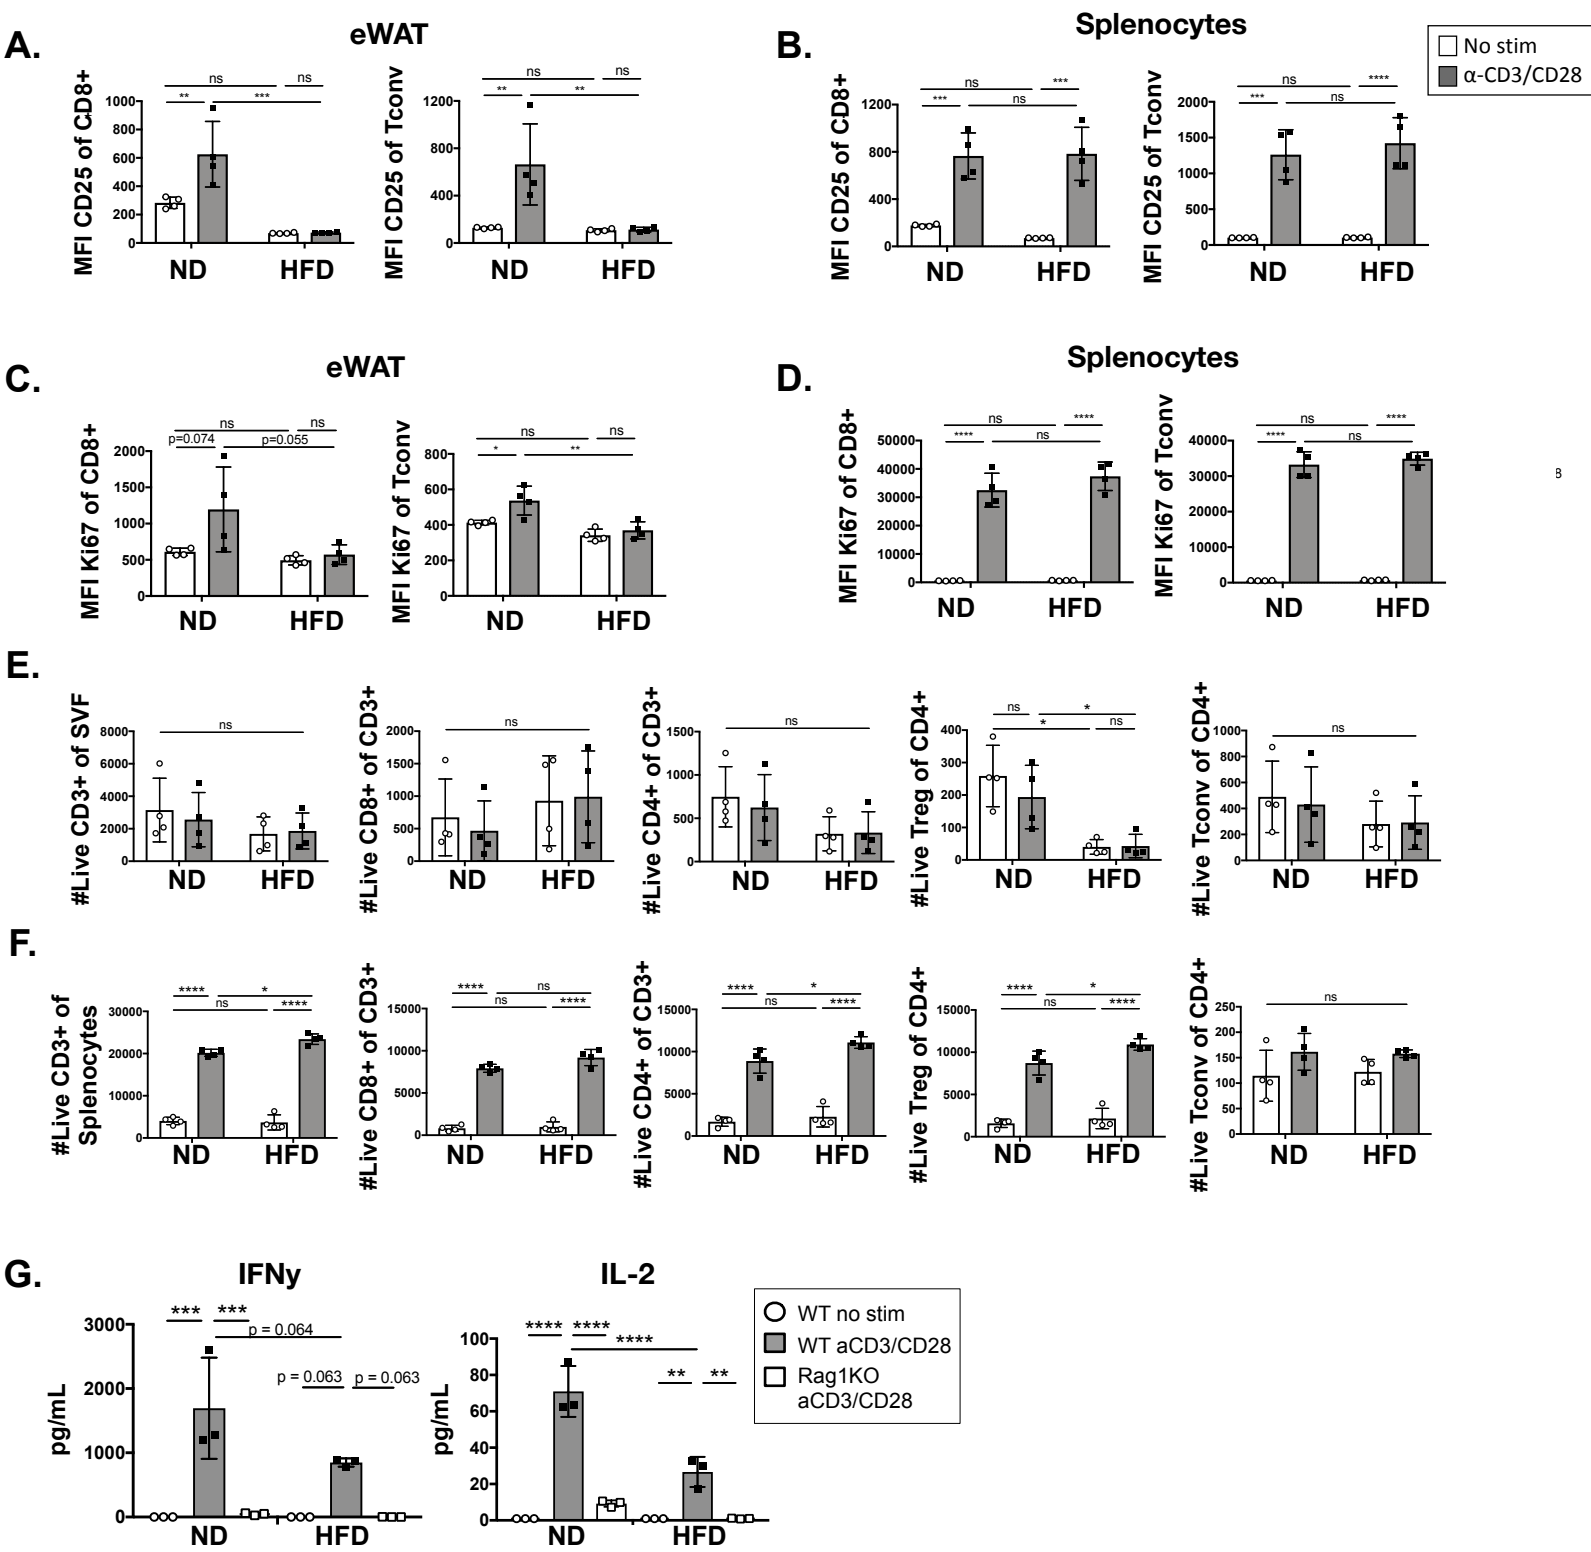

**Supplemental Figure 1: Additional descriptive data for ATT activation assay.**

(A) MFI of CD25, (B) MFI of Ki67 in CD8+ and Tconv ATT cells from eWAT after ATT Activation assays. (C) MFI of CD25, (D) MFI of Ki67 in CD8+ and Tconv ATT cells from Splenocytes after ATT Activation assays. (E) Number of eWAT cells, (F) Number of splenocytes seen in Live CD3+, total CD4+, Tconv, Treg, and CD8+ subpopulations in ATT activation assays. (G) Frequency of live cells in ATT activation cultures from eWAT and splenocytes, (H) IFN $\gamma$  and IL2 secretion from WT v Rag1KO SVF with  $\alpha$ CD3/CD28 dynabead treatment. (I) Bar graphs depicting heat map data in Figure 1E.

\* =  $p < 0.05$ , \*\* =  $p < 0.01$ , \*\*\* =  $p < 0.001$ , \*\*\*\* =  $p < 0.0001$

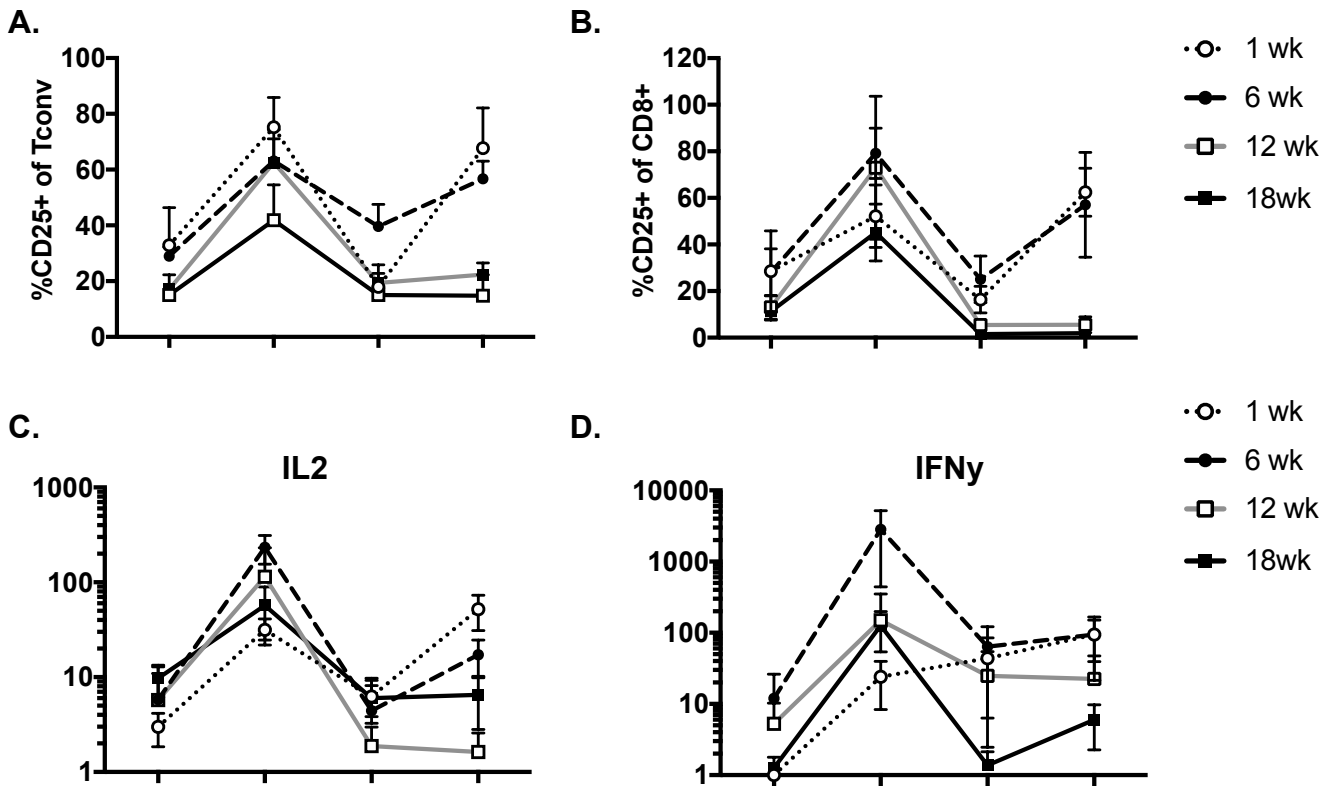

**Supplemental Figure 2: Additional descriptive data for ATT activation kinetics.**

(A) Line graphs of eWAT Tconv and (B) eWAT CD8+ ATT activation assays at 1, 6, 12, and 18 weeks of HFD feeding.

\* =  $p < 0.05$ , \*\* =  $p < 0.01$ , \*\*\* =  $p < 0.001$ , \*\*\*\* =  $p < 0.0001$

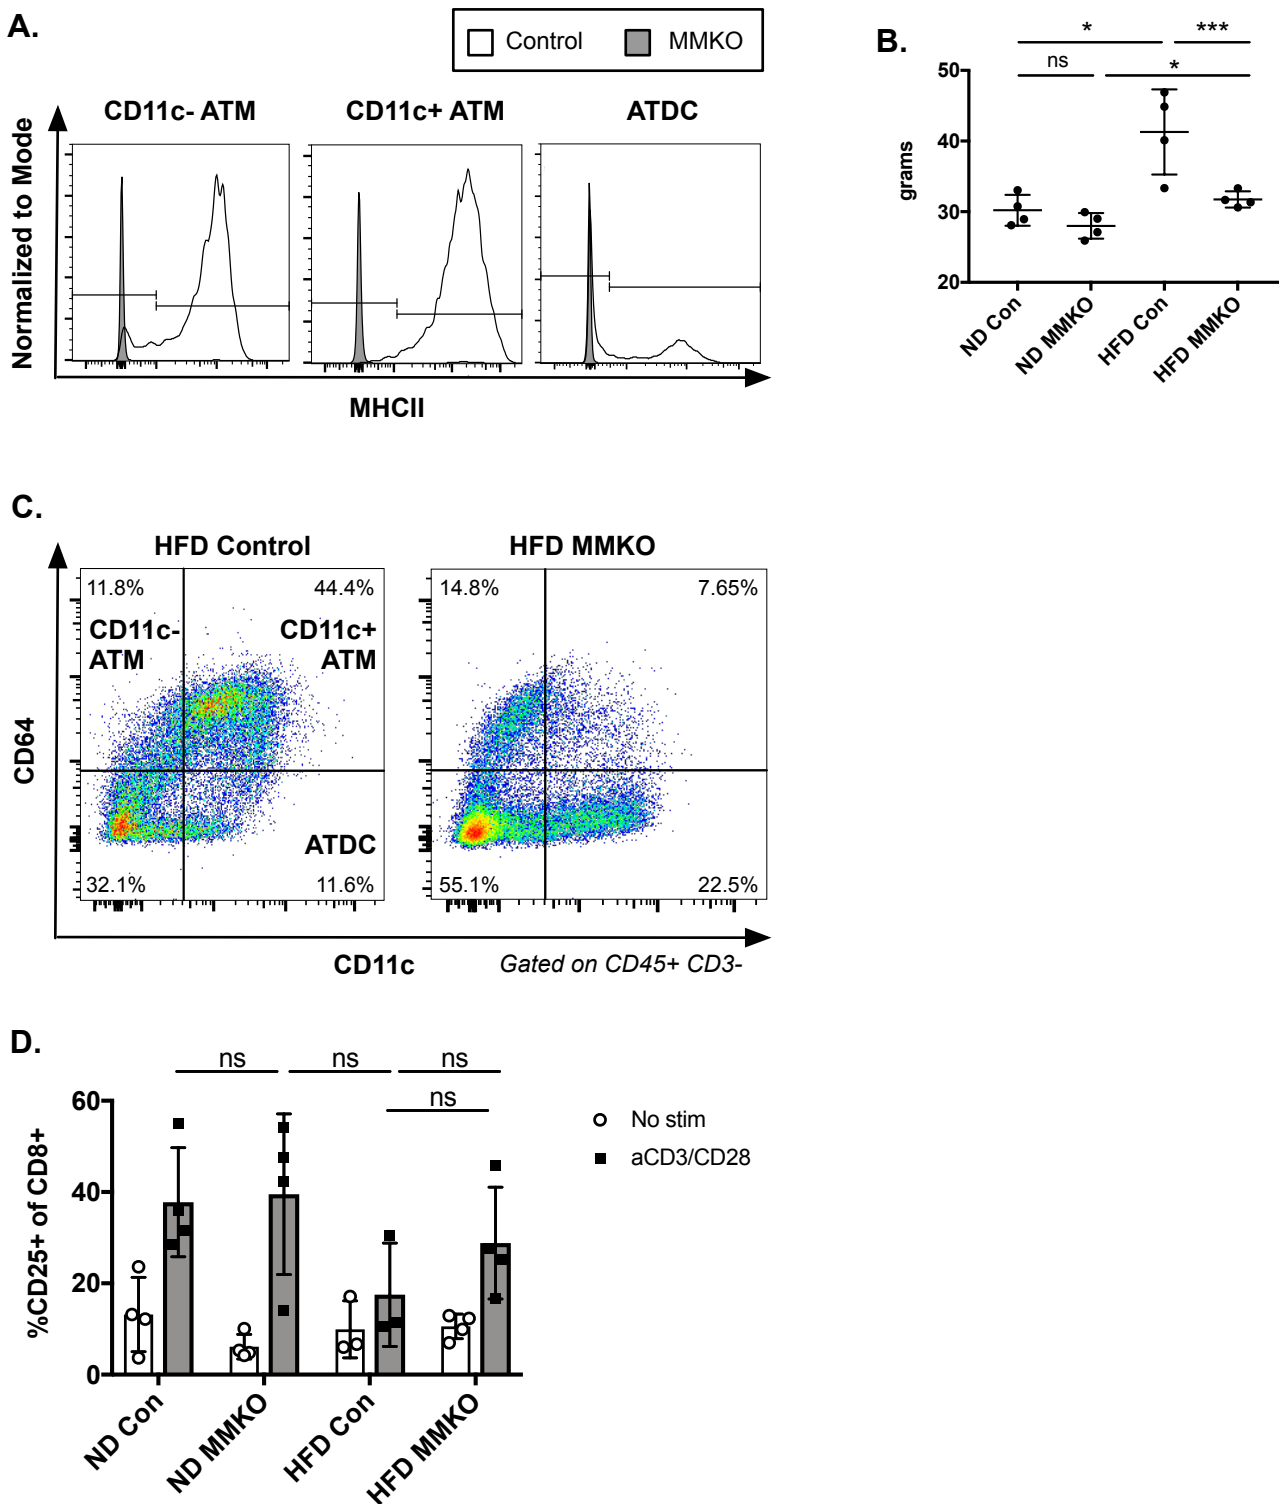

**Supplemental Figure 3: Metabolic and immunologic phenotype of HFD MMKO mice.**

(A) Flow plots illustrating MHCII knockout in the primary antigen presenting cells in HFD adipose tissue.

(B) Body weights of MMKO mice and controls.

(C) Flow plots illustrating antigen presenting cell subsets in HFD MMKO adipose tissue after 12 weeks.

(D) CD25 expression on MMKO CD8+ ATTs from eWAT following ATT activation assays.

\* =  $p < 0.05$ , \*\* =  $p < 0.01$ , \*\*\* =  $p < 0.001$ , \*\*\*\* =  $p < 0.0001$

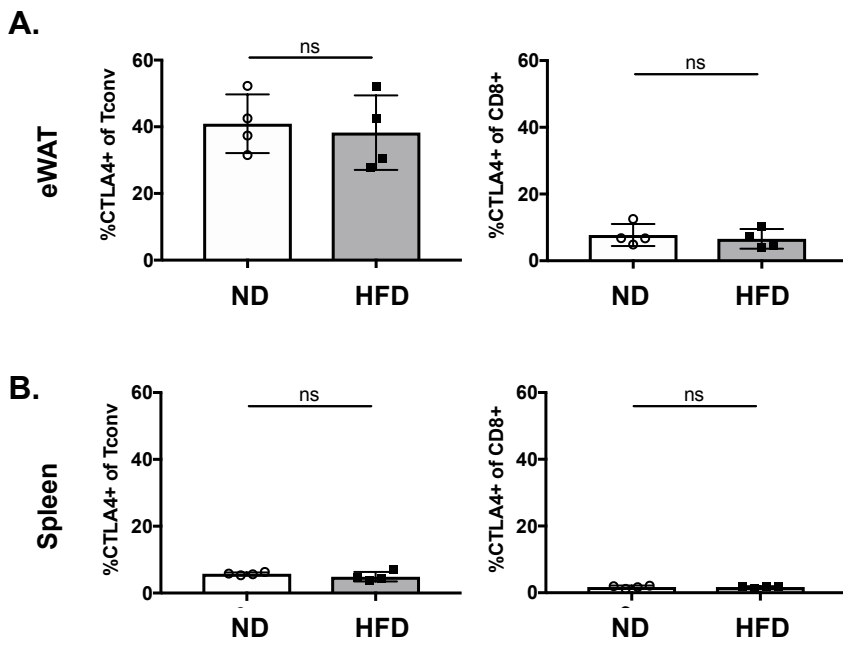

**Supplemental Figure 4: CTLA-4 and PDL1 expression on eWAT and splenocytes.**

(A) Frequency of CTLA-4 expression on freshly isolated Tconv and CD8+ eWAT ATTs and, (B) spleen, measured by flow cytometry.

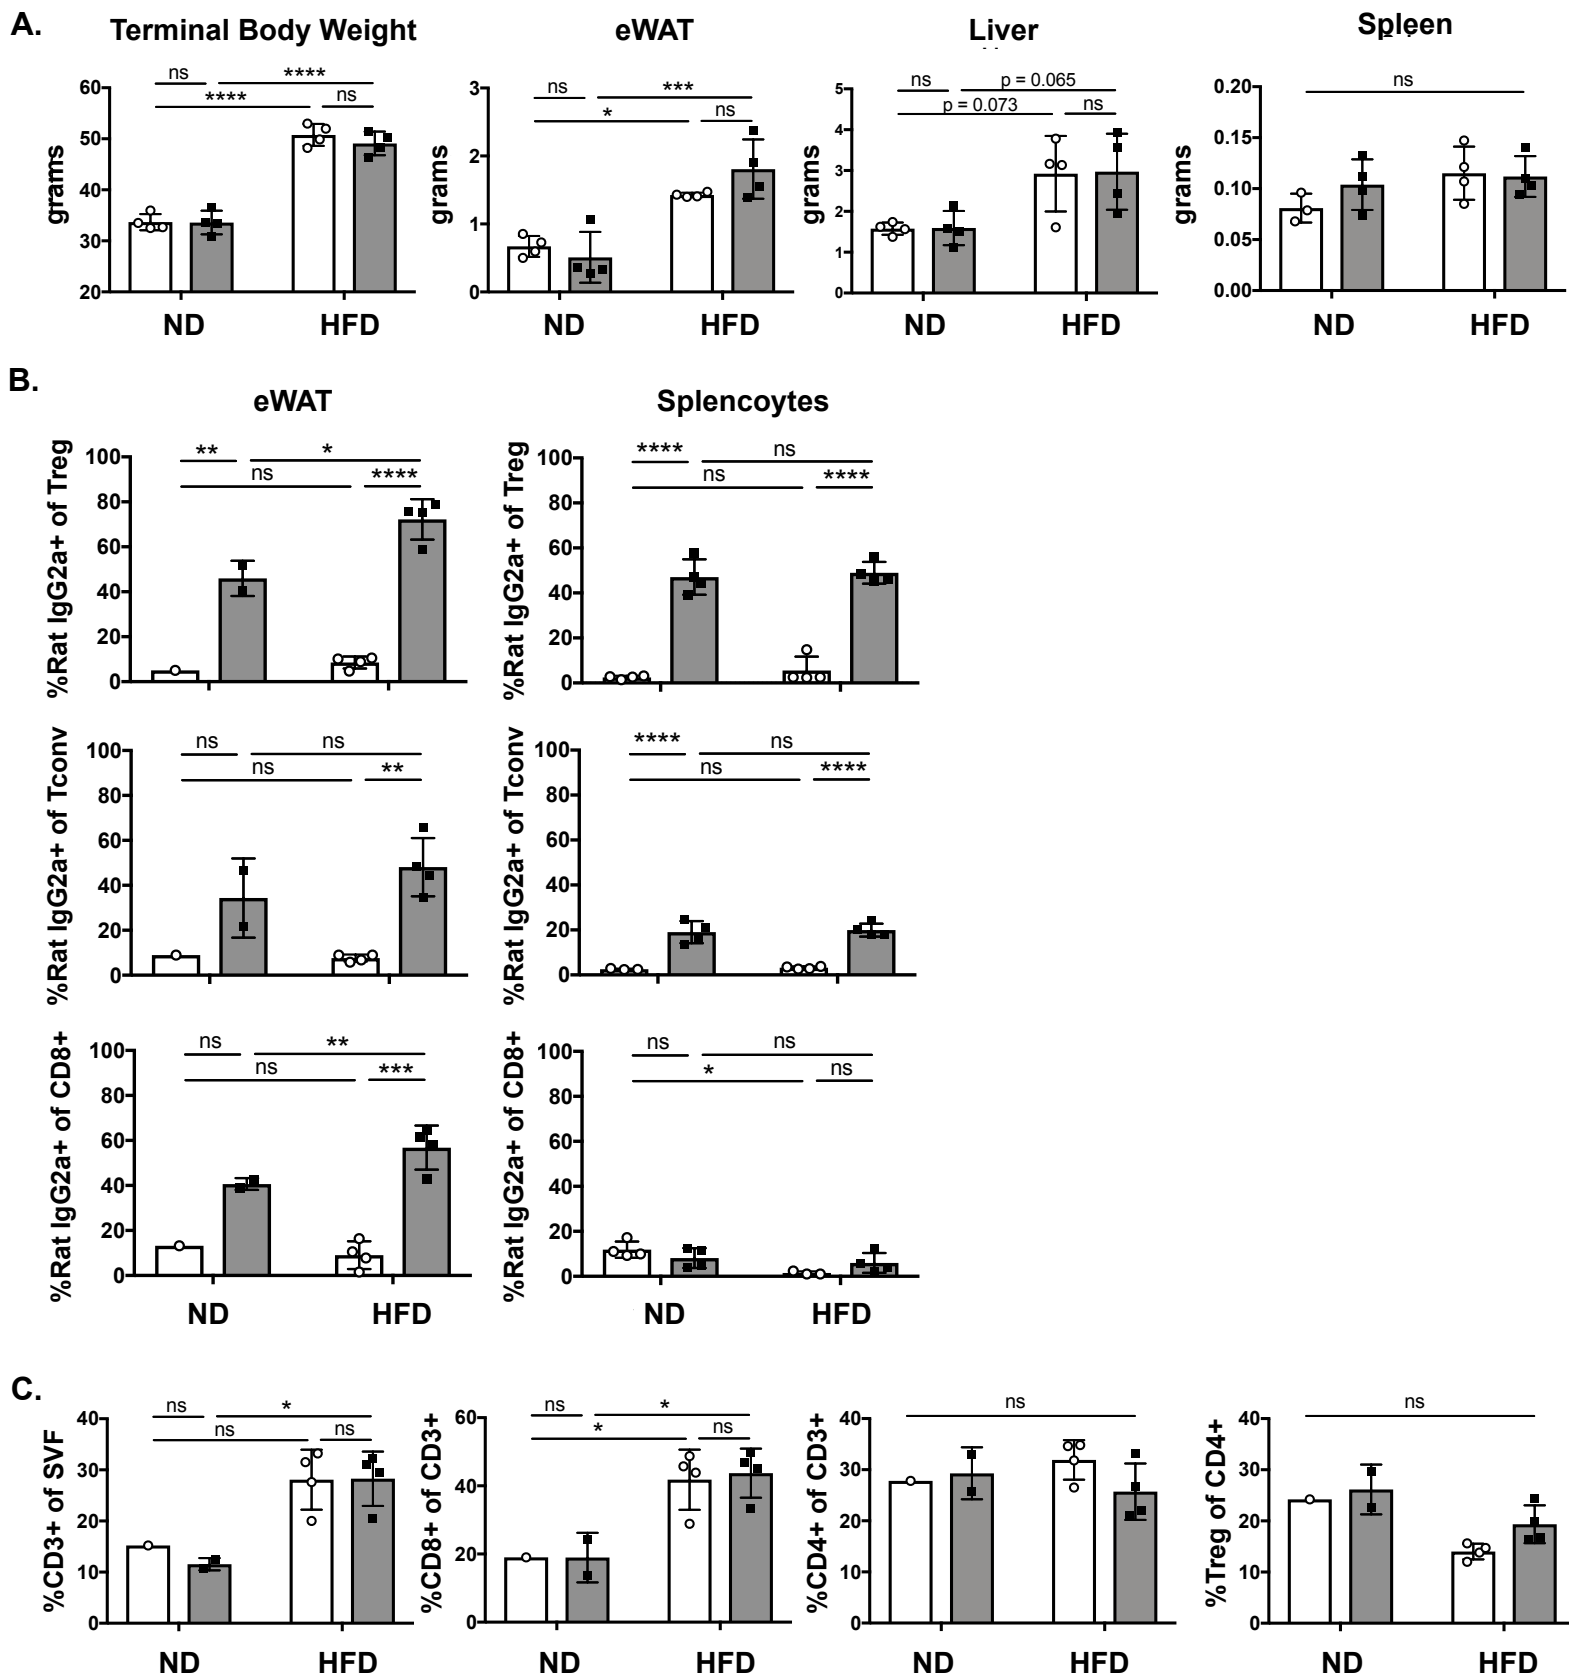

**Supplemental Figure 5: PD1 blockade phenotyping data of mice fed HFD for 18 weeks.**

(A) Terminal body and organ weights of PD1 blockade mice after IgG2a or PD1 antibody injections.

(B) Flow cytometric analysis of fresh non-cultured ATT cells after PD1 blockade.

(C) Flow cytometric measurement of T cells bound by Rat IgG2a (in-vivo PD1 antibody).

\* =  $p < 0.05$ , \*\* =  $p < 0.01$ , \*\*\* =  $p < 0.001$ , \*\*\*\* =  $p < 0.0001$

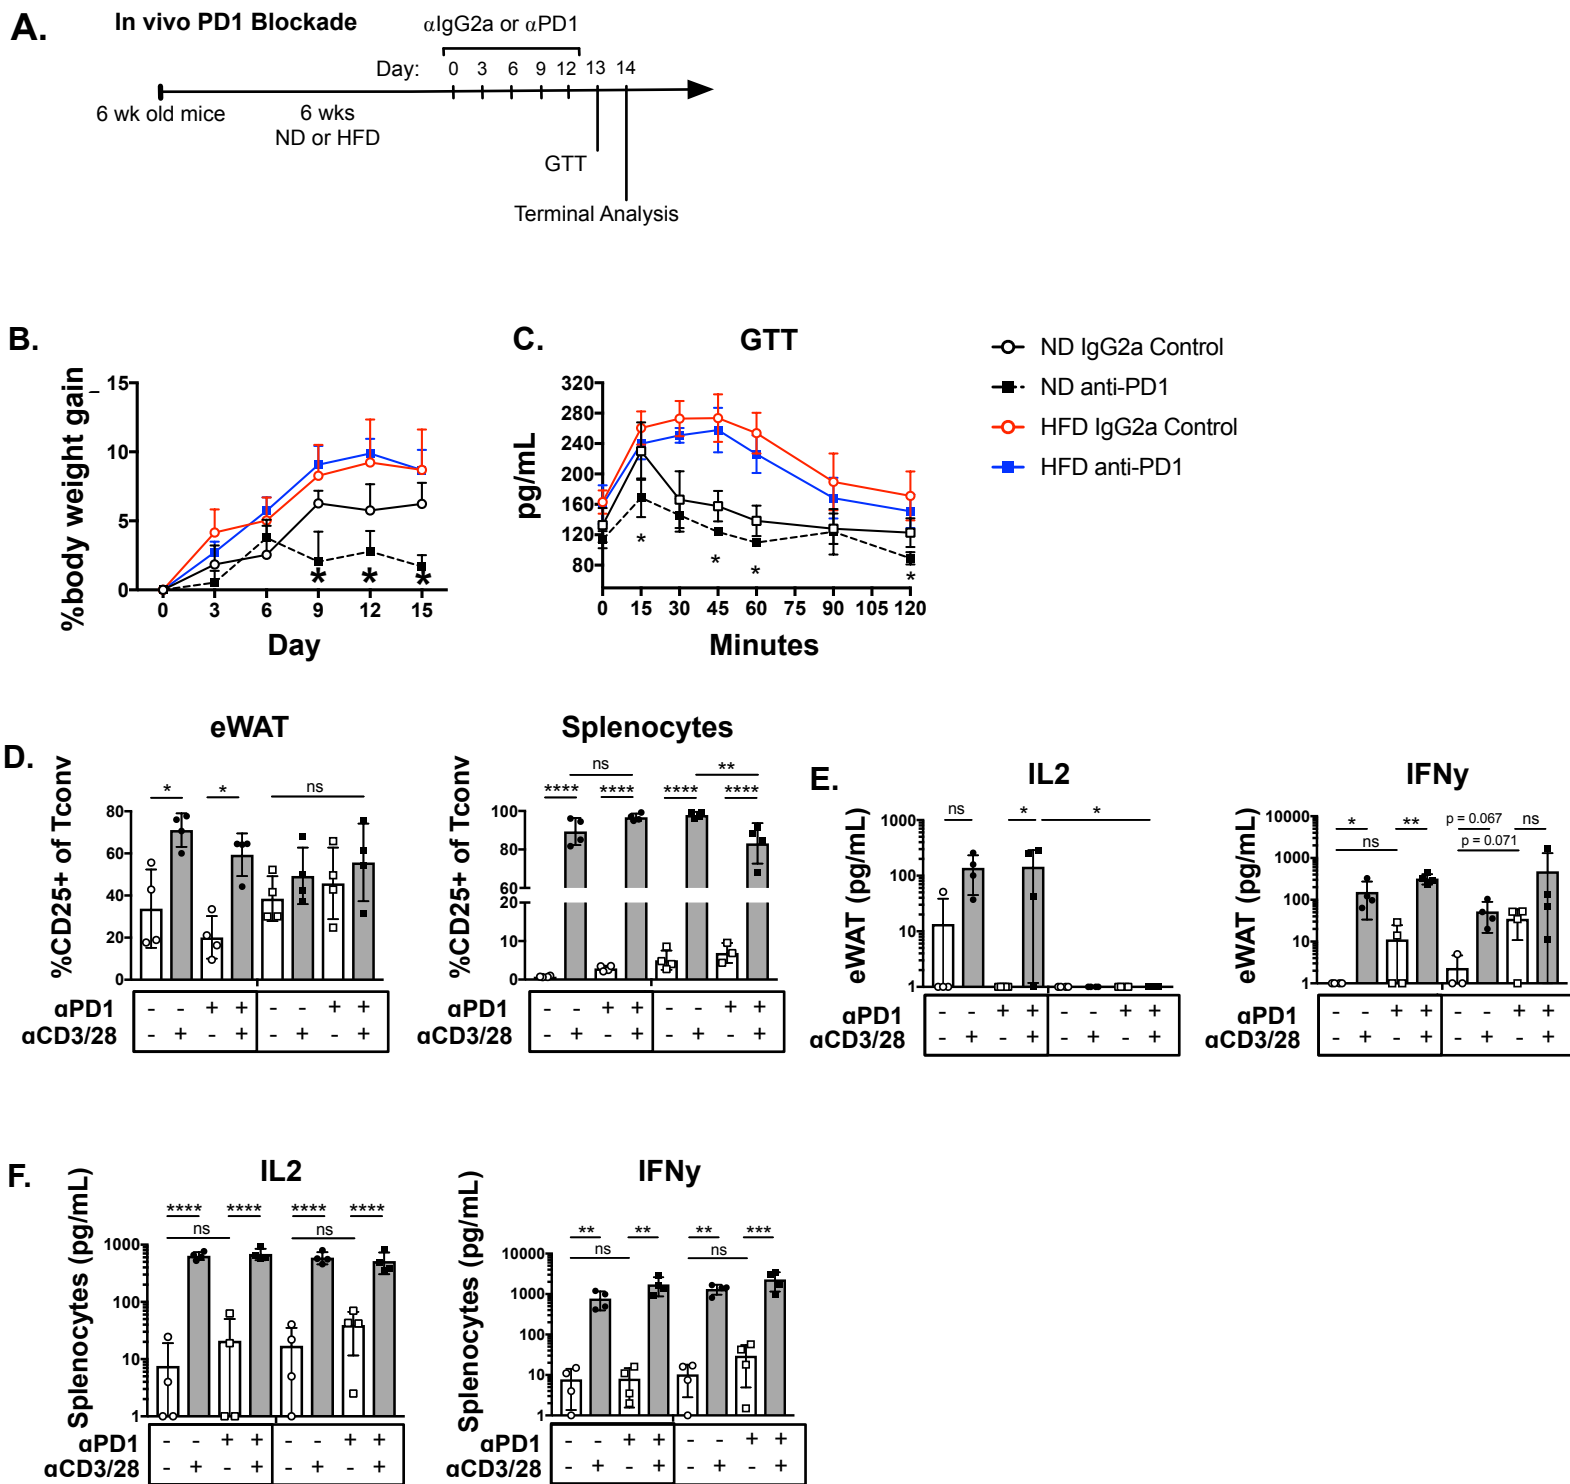

**Supplemental Figure 6: PD1 blockade does not reverse ATT impairment after 6 weeks of HFD feeding.**

(A) Model of PD1 blockade experiment. (B) Body weight changes of ND or HFD mice during the time course of IgG2a or PD1 antibody injections. (C) GTT after completed the day after a regimen of PD1 blockade. (D) CD25 expression on Tconv cells from eWAT and SPL after ATT activation assay. (E) IL2 and IFN $\gamma$  content in eWAT supernatants and, (F) splenocyte supernatants after ATT activation assays.

\* =  $p < 0.05$ , \*\* =  $p < 0.01$ , \*\*\* =  $p < 0.001$ , \*\*\*\* =  $p < 0.0001$

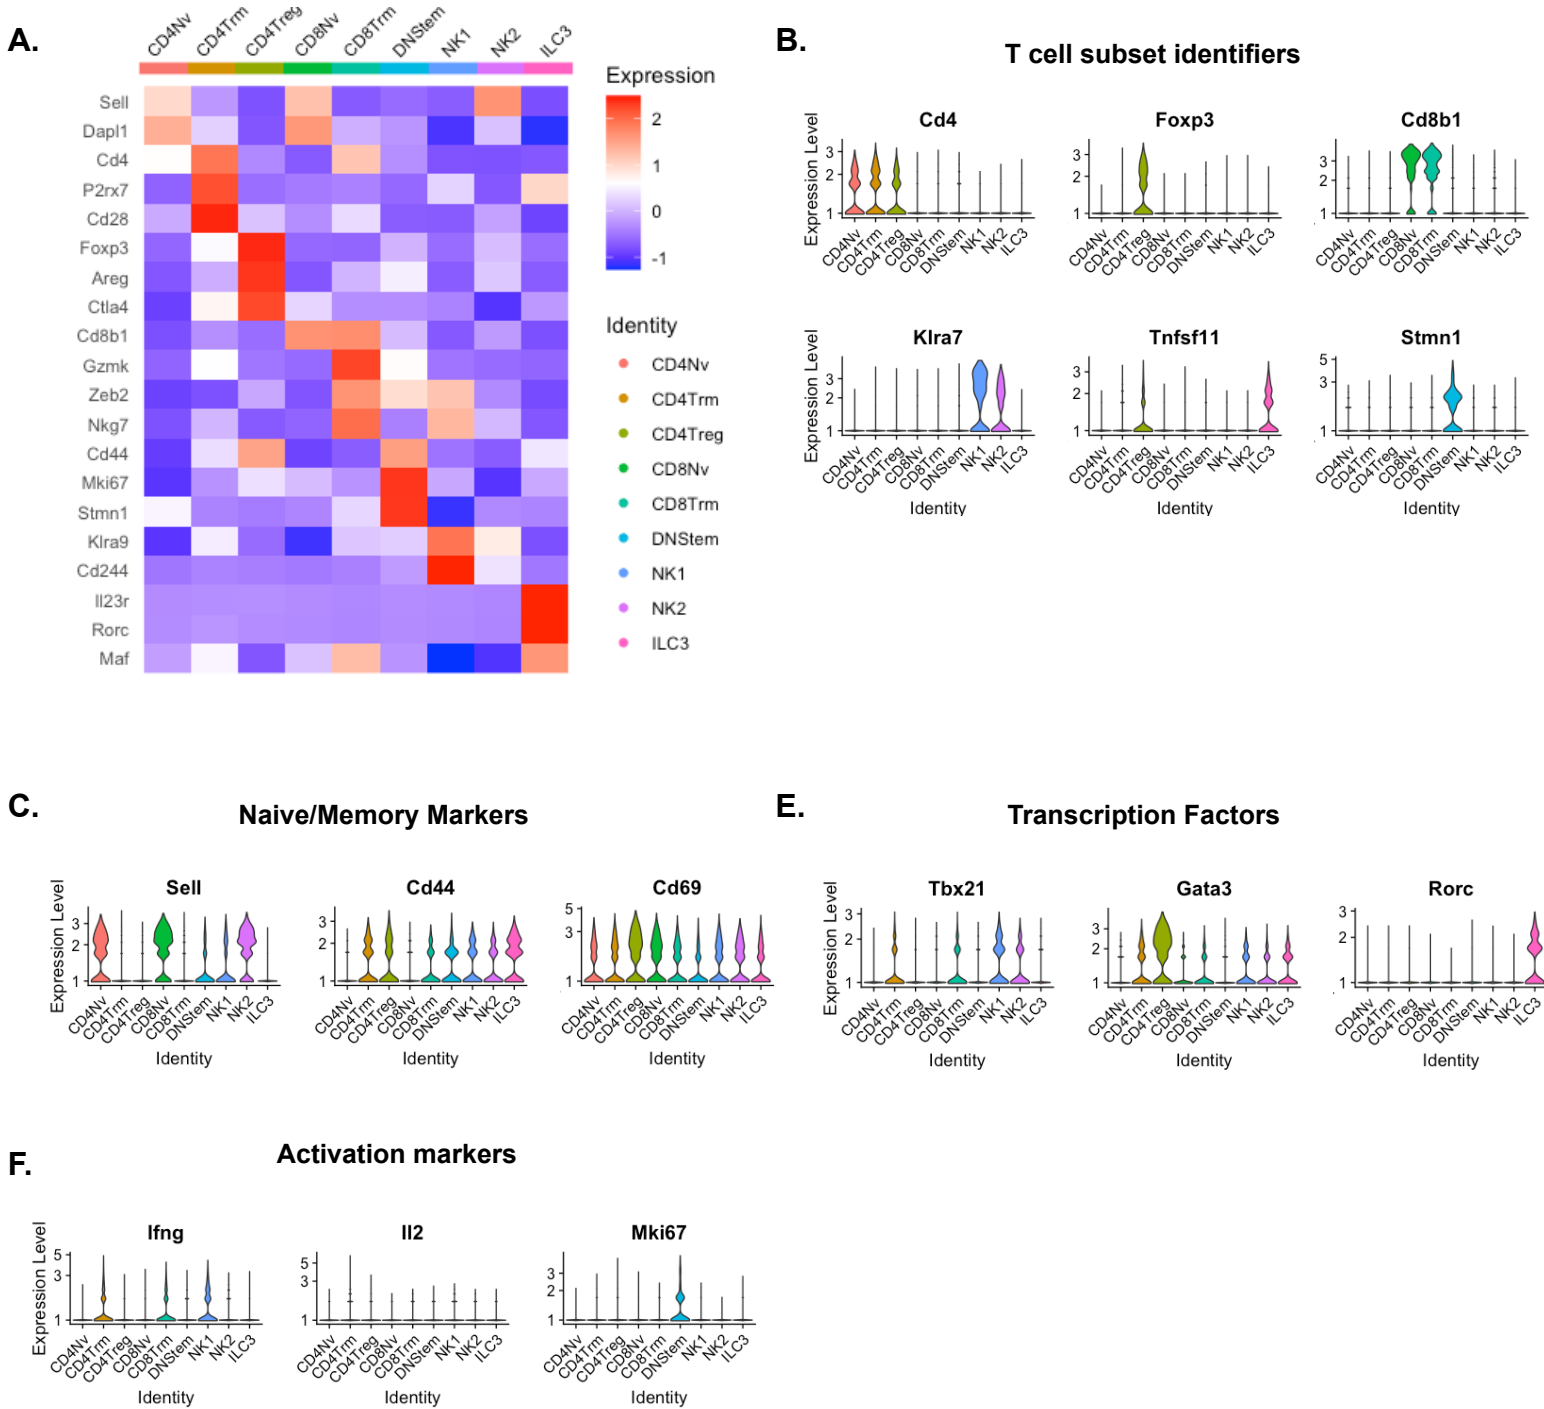

### Supplemental Figure 7: SC RNAseq of CD45+ CD3+ cells reveals 9 distinct ATT subsets

(A) Each cluster was compared and enriched genes for each group were used to determine the identity of each group. This heatmap shows gene of interest used to determine each cluster. (B) Violin plots showing gene expression markers associated with T cell and ILCs (C) Violin plots of naïve and memory T cell markers. (D) Violin plots of transcription factors used to distinguish Tconv and ILC subsets. (E) Violin plots of effector cytokines and markers of proliferation used to classify T cell activation and inflammation of ATT subsets.
